# Supplementary material for: A Single-Step Surface Modification of Electrospun Silica Nanofibers Using a Silica Binding Protein Fused with an RGD Motif for Enhanced PC12 Cell Growth and Differentiation
Source: PubMed Central journal article supplement (PMC6024934; doi:10.3390/ma11060927), 2018-05-30
Supplement: materials-11-00927-s001.pdf [file materials-11-00927-s001.pdf]

## Supplementary Information

# A single-step surface modification of electrospun silica nanofibers using silica binding protein fused with RGD motif for enhanced PC12 cells growth and differentiation

Wen Shuo Chen,<sup>1</sup> Ling Yu Guo,<sup>1</sup> Amien Mohamed Masroujeh,<sup>2</sup> Anna Morgan Augustine,<sup>2</sup> Cheng Kang Tsai,<sup>1</sup> Ting Yu Chin,<sup>3</sup> Yui Whei Chen-Yang<sup>1,\*</sup> and Mong-Lin Yang<sup>2,\*</sup>

<sup>1</sup> Department of Chemistry, Center for Nanotechnology, Center for Biomedical Technology, Chung Yuan Christian University, Chung Li, 32023, Taiwan; allanson92@yahoo.com.tw (W.S.C.); sunny\_day80917@yahoo.com.tw (L.Y.G.); chengkang20071994@gmail.com (C.K.T.)

<sup>2</sup> Department of Science, Concordia University Saint Paul, Saint Paul, Minnesota, 55104, USA; amasroujeh@gmail.com (A.M.M.); aaugustine@atsu.edu (A.M.A.)

<sup>3</sup> Department of Bioscience Technology, Chung Yuan Christian University, Chung Li, 32023, Taiwan; tychin@cycu.edu.tw (T.Y.C.)

\* Correspondence: myang2@csp.edu (M.-L.Y.); yuiwhei@cycu.edu.tw (Y.W.C.-Y.); Tel.: +1-651-6418220 (M.-L.Y.); Tel.: +866-3-2653317 (Y.W.C.-Y.)

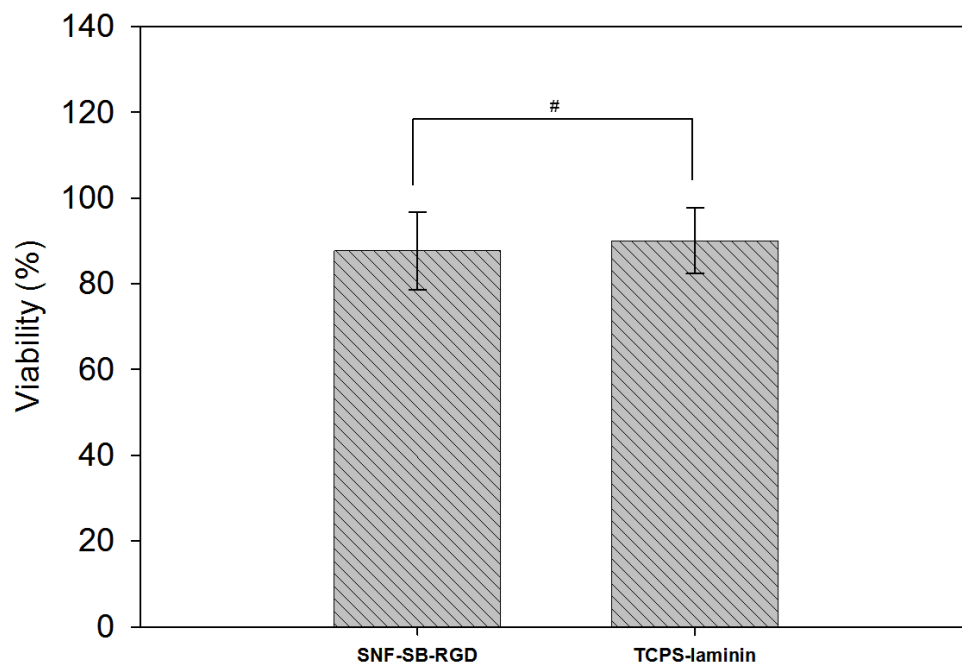

**Figure. S1** Cell viability comparison between PC12 cells cultured on SNF-SB-RGD and conventional control, laminin-coated tissue culture polystyrene (TCPS-laminin), which served as the positive control. Cell viability on SNF-SB-RGD was  $87.63 \pm 9.02\%$  and on TCPS-laminin  $90 \pm 7.68\%$ . Assessments were done using LIVE/DEAD® stain with Ethidium Homodimer-1 and Calcein AM 72 hours after seeding.  $n = 10$  t-test, # $p > 0.05$ .
